# Supplementary material for: The Legionella IcmSW Complex Directly Interacts with DotL to Mediate Translocation of Adaptor-Dependent Substrates
Source: PubMed Central journal article supplement (PMC3441705; doi:10.1371/journal.ppat.1002910), 2012-09-13
Supplement: ppat.1002910.s009.pdf [file ppat.1002910.s009.pdf]

Table S1. *dotLY725Stop* is able to transfer an RSF1010 mobilizable plasmid

| Description                                             | Rate of Transfer    |
|---------------------------------------------------------|---------------------|
| Wild type + RSF1010 <i>oriT</i> <sup>+</sup>            | 1.1E-5 +/- 3.1E-6   |
| Wild type + RSF1010 <i>oriT</i> <sup>-</sup>            | < 3.6E-8 +/- 4.8E-7 |
| $\Delta$ <i>dotA</i> + RSF1010 <i>oriT</i> <sup>+</sup> | < 2.6E-8 +/- 4.2E-7 |
| $\Delta$ <i>icmS</i> + RSF1010 <i>oriT</i> <sup>+</sup> | 1.1E-5 +/- 3.6E-6   |
| <i>dotLY725Stop</i> + RSF1010 <i>oriT</i> <sup>+</sup>  | 2.1E-5 +/- 3.7E-6   |
| <i>dotLY725Stop</i> + RSF1010 <i>oriT</i> <sup>-</sup>  | < 3.7E-8 +/- 5.2E-7 |
