# Supplementary material for: The Legionella IcmSW Complex Directly Interacts with DotL to Mediate Translocation of Adaptor-Dependent Substrates
Source: PubMed Central journal article supplement (PMC3441705; doi:10.1371/journal.ppat.1002910), 2012-09-13
Supplement: ppat.1002910.s010.pdf [file ppat.1002910.s010.pdf]

Table S2. IcmSW dependence of Dot/Icm substrates

| Substrate | Lpg# | Type IV adaptor-dependent secretion? | Assay to determine type IV adaptor dependent secretion | Interaction with the type IV adaptors | Reference                                                 |
|-----------|------|--------------------------------------|--------------------------------------------------------|---------------------------------------|-----------------------------------------------------------|
| AnkH      | 2300 | No                                   | 5                                                      | ND                                    | Habyarimana et al, 2010                                   |
| AnkI      | 1718 | No                                   | 5                                                      | ND                                    | Habyarimana et al, 2010                                   |
| AnkK      | 2322 | No                                   | 5                                                      | ND                                    | Habyarimana et al, 2010                                   |
| AnkN      | 0695 | No                                   | 5                                                      | ND                                    | Habyarimana et al, 2010                                   |
| LepA      | 2793 | No                                   | 3                                                      | ND                                    | Chen et al, 2007                                          |
| LepB      | 2490 | No                                   | 3                                                      | ND                                    | Chen et al, 2007                                          |
| LidA      | 0940 | No                                   | 2                                                      | ND                                    | Vincent et al, 2012                                       |
| LnaB      | 2527 | No                                   | 2                                                      | ND                                    | This study                                                |
| RalF      | 1950 | No                                   | 1                                                      | No (6)                                | Nagai et al, 2005/Ninio et al, 2005/Cambronne & Roy, 2007 |
| SidF      | 2584 | No                                   | 1                                                      | ND                                    | Cambronne & Roy, 2007                                     |
| AnkD      | 2456 | Yes                                  | 5                                                      | ND                                    | Habyarimana et al, 2010                                   |
| AnkG      | 0403 | Yes                                  | 5                                                      | ND                                    | Habyarimana et al, 2010                                   |
| AnkJ      | 436  | Yes                                  | 5                                                      | ND                                    | Habyarimana et al, 2010                                   |
| PieA      | 1963 | Yes                                  | 4                                                      | ND                                    | Ninio et al, 2009                                         |
| PieB      | 1964 | Yes                                  | 4                                                      | ND                                    | Ninio et al, 2009                                         |
| PieC      | 1965 | Yes                                  | 4                                                      | ND                                    | Ninio et al, 2009                                         |
| PieD      | 1966 | Yes                                  | 4                                                      | ND                                    | Ninio et al, 2009                                         |
| PieE      | 1969 | Yes                                  | 4                                                      | ND                                    | Ninio et al, 2009                                         |
| PieF      | 1972 | Yes                                  | 4                                                      | ND                                    | Ninio et al, 2009                                         |
| PieG      | 1976 | Yes                                  | 4                                                      | ND                                    | Ninio et al, 2009                                         |
| PpeA      | 1701 | Yes                                  | 4                                                      | ND                                    | Ninio et al, 2009                                         |
| PpeB      | 1702 | Yes                                  | 4                                                      | ND                                    | Ninio et al, 2009                                         |
| PpgA      | 2224 | Yes                                  | 4                                                      | ND                                    | Ninio et al, 2009                                         |
| SdeA      | 2157 | Yes                                  | 1                                                      | Yes (7)                               | Coers et al, 2000/Bardill et al, 2005                     |
| SidA      | 0621 | Yes                                  | 1                                                      | ND                                    | Cambronne & Roy, 2007                                     |
| SidB      | 1642 | Yes                                  | 1                                                      | ND                                    | Cambronne & Roy, 2007                                     |
| SidC      | 2511 | Yes                                  | 1                                                      | ND                                    | Cambronne & Roy, 2007                                     |
| SidD      | 2465 | Yes                                  | 1                                                      | ND                                    | Cambronne & Roy, 2007                                     |
| SidE      | 0234 | Yes                                  | 1                                                      | ND                                    | Cambronne & Roy, 2007                                     |
| SidG      | 1355 | Yes                                  | 1, 4                                                   | Yes (8)                               | Ninio et al, 2005/Cambronne & Roy, 2007                   |
| SidH      | 2829 | Yes                                  | 1                                                      | Yes (9)                               | Ninio et al, 2005                                         |
| VipA      | 0390 | Yes                                  | 2                                                      | ND                                    | Vincent et al, 2012                                       |
| WipA      | 2718 | Yes                                  | 1                                                      | Yes (8)                               | Ninio et al, 2005                                         |
| WipB      | 0642 | Yes                                  | 1                                                      | Yes (9)                               | Ninio et al, 2005                                         |

Assay for type IV adaptor-dependent secretion:

- 1 - Adenylate cyclase assay using a  $\Delta icmS$  & a  $\Delta icmW$  strain
- 2 - Adenylate cyclase assay using a  $\Delta icmS$  strain
- 3 - Adenylate cyclase assay using a  $\Delta icmS$  strain (data not shown)
- 4 - Adenylate cyclase assay using a  $\Delta icmS \Delta icmW$  strain
- 5 - Adenylate cyclase assay - data not shown

Assay for interaction with the type IV adaptor proteins:

- 6 - co-affinity purification with His:IcmW+IcmS
  - 7 - Far western & affinity chromatography with GST:IcmS
  - 8 - Yeast two-hybrid with IcmW & co-affinity purification with His:IcmW+IcmS
  - 9 - Yeast two-hybrid with IcmW
- ND - Not determined
