# Supplementary material for: The Legionella IcmSW Complex Directly Interacts with DotL to Mediate Translocation of Adaptor-Dependent Substrates
Source: PubMed Central journal article supplement (PMC3441705; doi:10.1371/journal.ppat.1002910), 2012-09-13
Supplement: ppat.1002910.s011.pdf [file ppat.1002910.s011.pdf]

Table S3. Relevant strains, plasmid, and primers employed in this study

| Strain, Plasmid, Primer | Relevant properties                                                                | Reference or source     |
|-------------------------|------------------------------------------------------------------------------------|-------------------------|
| <i>L. pneumophila</i>   |                                                                                    |                         |
| Lp02                    | Philadelphia-1 <i>rspL hsdR thyA</i>                                               | Berger and Isberg, 1993 |
| Lp03                    | Lp02 <i>dotA</i>                                                                   | Berger and Isberg, 1993 |
| JV1003                  | Lp02 <i>dotL/ΔdotL::Cm<sup>R</sup></i>                                             | Sexton et al, 2005      |
| JV1138                  | Lp02 + pKB5                                                                        | This study              |
| JV1139                  | Lp02 + pJB908                                                                      | Bardill et al, 2005     |
| JV1141                  | Lp03 + pJB908                                                                      | Bardill et al, 2005     |
| JV1962                  | Lp02 <i>ΔicmS</i>                                                                  | Vincent et al, 2006     |
| JV2064                  | Lp02 <i>ΔdotA</i>                                                                  | Vincent et al, 2006     |
| JV2282                  | Lp02 <i>ΔicmS dotL/ΔdotL::Cm<sup>R</sup></i>                                       | This study              |
| JV2422                  | Lp02 <i>ΔdotA ΔdotL::Cm<sup>R</sup></i>                                            | Buscher et al, 2005     |
| JV2700                  | Lp02 + CyaA:SdeA (pJB2588)                                                         | Bardill et al, 2005     |
| JV2700                  | Lp02 + CyaA:SdeA (pJB2588)                                                         | Bardill et al, 2005     |
| JV3901                  | Lp02 + CyaA:RalF (pJB2590)                                                         | Bardill et al, 2005     |
| JV4159                  | Lp02 <i>ΔdotA</i> + pKB5                                                           | This study              |
| JV5705                  | Lp02 + CyaA:VipA (pJB4509)                                                         | This study              |
| JV5810                  | Lp02 <i>ΔicmS</i> + pKB5                                                           | This study              |
| JV6064                  | Lp02 <i>ΔicmS</i> (JV1962) + CyaA:RalF (pJB2590)                                   | This study              |
| JV6066                  | Lp02 <i>ΔicmS</i> (JV1962) + CyaA:SdeA (pJB2588)                                   | This study              |
| JV6069                  | Lp02 <i>ΔicmS</i> (JV1962) + CyaA:VipA (pJB4509)                                   | This study              |
| JV6688                  | Lp02 <i>ΔdotL::Cm<sup>R</sup></i> + DotL amino acids 1-773 (pJB5273)               | This study              |
| JV6698                  | Lp02 <i>ΔdotA ΔdotL::Cm<sup>R</sup></i> + pJB4858                                  | This study              |
| JV6743                  | Lp02 + CyaA:SidD (pJB5169)                                                         | This study              |
| JV6867                  | Lp02 <i>ΔdotL::Cm<sup>R</sup></i> + DotLY531C (pJB5289)                            | This study              |
| JV6963                  | Lp02 <i>ΔdotL::Cm<sup>R</sup></i> + DotLN393D (pJB5285)                            | This study              |
| JV6964                  | Lp02 <i>ΔdotL::Cm<sup>R</sup></i> + DotLF460L (pJB5286)                            | This study              |
| JV6965                  | Lp02 <i>ΔdotL::Cm<sup>R</sup></i> + DotLY725Stop (pJB5287)                         | This study              |
| JV6966                  | Lp02 <i>ΔdotL::Cm<sup>R</sup></i> + DotLD533N (pJB5288)                            | This study              |
| JV6969                  | Lp02 <i>ΔdotL::Cm<sup>R</sup></i> + DotLK386R (pJB5291)                            | This study              |
| JV6970                  | Lp02 <i>ΔdotL::Cm<sup>R</sup></i> + DotLF275S (pJB5292)                            | This study              |
| JV6971                  | Lp02 <i>ΔdotL::Cm<sup>R</sup></i> + DotLQ222R (pJB5293)                            | This study              |
| JV6972                  | Lp02 <i>ΔdotL::Cm<sup>R</sup></i> + DotLN312D (pJB5294)                            | This study              |
| JV6974                  | Lp02 <i>ΔdotL::Cm<sup>R</sup></i> + DotLM239T (pJB5296)                            | This study              |
| JV6975                  | Lp02 <i>ΔdotL::Cm<sup>R</sup></i> + <i>dotL+</i> (pJB4860)                         | This study              |
| JV6996                  | Lp02 <i>ΔdotL::Cm<sup>R</sup></i> + DotLN486T (pJB5284)                            | This study              |
| JV6997                  | Lp02 <i>ΔdotL::Cm<sup>R</sup></i> + DotLE390G (pJB5295)                            | This study              |
| JV7283                  | Lp02 <i>ΔdotL::Cm<sup>R</sup></i> + DotL amino acids 1-694/7115-783 (pJB6320)      | This study              |
| JV7287                  | Lp02 <i>ΔicmS ΔdotL::Cm<sup>R</sup></i> + DotL amino acids 1-694/715-783 (pJB6320) | This study              |
| JV7325                  | Lp02 DotLY725Stop                                                                  | This study              |
| JV7502                  | Lp02 DotLY725Stop (JV7325) + CyaA:SdeA (pJB2588)                                   | This study              |
| JV7503                  | Lp02 DotLY725Stop (JV7325) + CyaA:RalF (pJB2590)                                   | This study              |
| JV7506                  | Lp02 DotLY725Stop (JV7325) + CyaA:VipA (pJB4509)                                   | This study              |
| JV7584                  | Lp02 DotLY725Stop + JB908                                                          | This study              |
| JV7585                  | Lp02 DotLY725Stop + pKB5                                                           | This study              |
| JV7590                  | Lp02 <i>ΔdotA ΔdotL::Cm<sup>R</sup></i> + DotL amino acids 1-725 (pJB5499)         | This study              |
| JV7592                  | Lp02 <i>ΔdotA ΔdotL::Cm<sup>R</sup></i> + DotL amino acids 1-733 (pJB5556)         | This study              |
| JV7593                  | Lp02 <i>ΔdotA ΔdotL::Cm<sup>R</sup></i> + DotL amino acids 1-743 (pJB5557)         | This study              |
| JV7638                  | Lp02 <i>ΔdotA ΔdotL::Cm<sup>R</sup></i> + DotL amino acids 1-724/734-783 (pJB6021) | This study              |
| JV7645                  | Lp02 DotLY725Stop <i>ΔicmS</i>                                                     | This study              |
| JV7659                  | Lp02 + CyaA:LidA (pJB5797)                                                         | This study              |
| JV7661                  | Lp02 DotLY725Stop (JV7325) + CyaA:LidA (pJB5797)                                   | This study              |
| JV7662                  | Lp02 <i>ΔicmS</i> (JV1962) + CyaA:LidA (pJB5797)                                   | This study              |
| JV7690                  | Lp02 DotLY725Stop <i>ΔicmS</i> (JV7645) + CyaA:SdeA (pJB2588)                      | This study              |
| JV7691                  | Lp02 DotLY725Stop <i>ΔicmS</i> (JV7645) + CyaA:RalF (pJB2590)                      | This study              |

|        |                                                                                    |            |
|--------|------------------------------------------------------------------------------------|------------|
| JV7694 | Lp02 DotLY725Stop <i>ΔicmS</i> (JV7645) + CyaA:VipA (pJB4509)                      | This study |
| JV7699 | Lp02 DotLY725Stop <i>ΔicmS</i> (JV7645) + CyaA:LidA (pJB5797)                      | This study |
| JV7717 | Lp02 + CyaA:LnaB (pJB5562)                                                         | This study |
| JV7718 | Lp02 <i>ΔdotA ΔdotL::Cm<sup>R</sup></i> + DotL amino acids 1-773 (pJB5273)         | This study |
| JV7719 | Lp02 <i>ΔdotA ΔdotL::Cm<sup>R</sup></i> + DotL amino acids 1-763 (pJB5275)         | This study |
| JV7720 | Lp02 <i>ΔdotA ΔdotL::Cm<sup>R</sup></i> + DotL amino acids 1-753 (pJB5277)         | This study |
| JV7728 | Lp02 <i>ΔicmS</i> (JV1962) + CyaA:SidD (pJB5169)                                   | This study |
| JV7730 | Lp02 <i>ΔicmS</i> (JV1962) + CyaA:LnaB (pJB5562)                                   | This study |
| JV7732 | Lp02 DotLY725Stop (JV7325) + CyaA:SidD (pJB5169)                                   | This study |
| JV7734 | Lp02 DotLY725Stop (JV7325) + CyaA:LnaB (pJB5562)                                   | This study |
| JV7744 | Lp02 DotLY725Stop <i>ΔicmS</i> (JV7645) + CyaA:SidD (pJB5169)                      | This study |
| JV7746 | Lp02 DotLY725Stop <i>ΔicmS</i> (JV7645) + CyaA:LnaB (pJB5562)                      | This study |
| JV7761 | Lp02 <i>ΔdotA ΔdotL::Cm<sup>R</sup></i> + <i>dotL</i> + (pJB4860)                  | This study |
| JV7762 | Lp02 <i>ΔdotA ΔdotL::Cm<sup>R</sup></i> + DotL amino acids 1-694/705-783 (pJB5751) | This study |
| JV7763 | Lp02 <i>ΔdotA ΔdotL::Cm<sup>R</sup></i> + DotL amino acids 1-684/695-783 (pJB5752) | This study |
| JV7764 | Lp02 <i>ΔdotA ΔdotL::Cm<sup>R</sup></i> + DotL amino acids 1-674/685-783 (pJB5753) | This study |
| JV7765 | Lp02 <i>ΔdotA ΔdotL::Cm<sup>R</sup></i> + DotL amino acids 1-704/715-783 (pJB5754) | This study |
| JV7766 | Lp02 <i>ΔdotA ΔdotL::Cm<sup>R</sup></i> + DotL amino acids 1-709/720-783 (pJB5755) | This study |
| JV7767 | Lp02 <i>ΔdotA ΔdotL::Cm<sup>R</sup></i> + DotL amino acids 1-714/725-783 (pJB5756) | This study |
| JV7876 | Lp02 <i>ΔdotA ΔdotL::Cm<sup>R</sup></i> + DotL amino acids 1-670/754-783 (pJB6101) | This study |
| JV7883 | Lp02 <i>ΔdotA ΔdotL::Cm<sup>R</sup></i> + DotL amino acids 1-734/754-783 (pJB6108) | This study |
| JV7929 | Lp02 <i>ΔdotA ΔdotL::Cm<sup>R</sup></i> + DotL amino acids 1-749/760-783 (pJB6129) | This study |
| JV7930 | Lp02 <i>ΔdotA ΔdotL::Cm<sup>R</sup></i> + DotL amino acids 1-744/755-783 (pJB6130) | This study |
| JV7931 | Lp02 <i>ΔdotA ΔdotL::Cm<sup>R</sup></i> + DotL amino acids 1-739/750-783 (pJB6131) | This study |
| JV7932 | Lp02 <i>ΔdotA ΔdotL::Cm<sup>R</sup></i> + DotL amino acids 1-734/745-783 (pJB6132) | This study |
| JV7933 | Lp02 <i>ΔdotA ΔdotL::Cm<sup>R</sup></i> + DotL amino acids 1-729/740-783 (pJB6133) | This study |
| JV7970 | Lp02 <i>ΔdotA ΔdotL::Cm<sup>R</sup></i> + DotL amino acids 1-674/695-783 (pJB6319) | This study |
| JV7971 | Lp02 <i>ΔdotA ΔdotL::Cm<sup>R</sup></i> + DotL amino acids 1-694/715-783 (pJB6320) | This study |
| JV7972 | Lp02 <i>ΔdotA ΔdotL::Cm<sup>R</sup></i> + DotL amino acids 1-714/734-783 (pJB6321) | This study |
| JV7975 | Lp02 DotL amino acids 1-735/754-783                                                | This study |
| JV7992 | Lp02 DotL amino acids 1-735/754-783 + CyaA:RalF (pJB2590)                          | This study |
| JV7993 | Lp02 DotL amino acids 1-735/754-783 + CyaA:LidA (pJB5797)                          | This study |
| JV7994 | Lp02 DotL amino acids 1-735/754-783 + CyaA:LnaB (pJB5562)                          | This study |
| JV7995 | Lp02 DotL amino acids 1-735/754-783 + CyaA:SdeA (pJB2588)                          | This study |
| JV7996 | Lp02 DotL amino acids 1-735/754-783 + CyaA:VipA (pJB4509)                          | This study |
| JV7997 | Lp02 DotL amino acids 1-735/754-783 + CyaA:SidD (pJB5169)                          | This study |
| JV8117 | Lp02 <i>ΔicmS ΔdotL::Cm<sup>R</sup></i> + <i>dotL</i> (pJB4860)                    | This study |
| JV8119 | Lp02 <i>ΔicmS ΔdotL::Cm<sup>R</sup></i> + DotL amino acids 1-773 (pJB5273)         | This study |

*E. coli*

|        |                                                                                    |            |
|--------|------------------------------------------------------------------------------------|------------|
| C600   | F- <i>thr leu thi lac tonA</i>                                                     | ?          |
| ER1821 | F- <i>glnV44 e14-(McrA-) rfbD1? relA1? endA1 spoT1? thi-1 Δ(mcrC-mrr)114::IS10</i> | ?          |
| JB5470 | C600 His:IcmS+IcmW (pJB5316) and GST:DotL amino acids 681-783 (pJB5424)            | This study |
| JB5471 | C600 His:IcmS+IcmW (pJB5316) and GST:DotL amino acids 671-783 (pJB5649)            | This study |
| JB5472 | C600 His:IcmS+IcmW (pJB5316) and GST:DotL amino acids 661-783 (pJB5647)            | This study |
| JB5473 | C600 His:IcmS+IcmW (pJB5316) and GST:DotL amino acids 651-783 (pJB5645)            | This study |
| JB5474 | C600 His:IcmS+IcmW (pJB5316) and GST:DotL amino acids 641-783 (pJB5643)            | This study |
| JB5474 | C600 His:IcmS+IcmW (pJB5316) and GST:DotL amino acids 641-783 (pJB5643)            | This study |
| JB5475 | C600 His:IcmS+IcmW (pJB5316) and GST:DotL amino acids 631-783 (pJB5641)            | This study |
| JB5475 | C600 His:IcmS+IcmW (pJB5316) and GST:DotL amino acids 631-783 (pJB5641)            | This study |
| JB5564 | C600 His:IcmS+IcmW (pJB5316) and GST:DotL amino acids 691-783 (pJB6092)            | This study |
| JB5565 | C600 His:IcmS+IcmW (pJB5316) and GST:DotL amino acids 671-780 (pJB6093)            | This study |
| JB5566 | C600 His:IcmS+IcmW (pJB5316) and GST:DotL amino acids 661-780 (pJB6094)            | This study |
| JB5568 | C600 His:IcmS+IcmW (pJB5316) and GST:DotL amino acids 671-753 (pJB6096)            | This study |
| JB6204 | C600 His:IcmS+IcmW (pJB5316) and GST:DotL amino acids 701-783 (pJB5582)            | This study |
| JB6205 | C600 His:IcmS+IcmW (pJB5316) and GST:DotL amino acids 711-783 (pJB5585)            | This study |
| JB6214 | C600 His:IcmS+IcmW (pJB5316) and GST:DotL amino acids 661-763 (pJB6202)            | This study |
| JB6265 | C600 His:IcmS+IcmW (pJB5316) and GST:DotL amino acids 631-670/754-783 (pJB5919)    | This study |

|                |                                                                                   |                         |
|----------------|-----------------------------------------------------------------------------------|-------------------------|
| JB6266         | C600 His:IcmS+IcmW (pJB5316) and GST:DotL amino acids 631-734/754-783 (pJB5921)   | This study              |
| JB6460         | C600 His:IcmS+IcmW (pJB5316) and GST:DotL amino acids 661-773 (pJB6252)           | This study              |
| JB6461         | C600 His:IcmS+IcmW (pJB5316) and GST:DotL amino acids 671-773 (pJB6254)           | This study              |
| JB6462         | C600 His:IcmS+IcmW (pJB5316) and GST:DotL amino acids 671-763 (pJB6215)           | This study              |
| JB6463         | C600 His:IcmS+IcmW (pJB5316) and GST:DotL amino acids 661-753 (pJB6256)           | This study              |
| JB6464         | C600 pQE-30 Kan <sup>R</sup> (pJB5457) and GST:DotL amino acids 631-783 (pJB5641) | This study              |
| JB6465         | C600 pQE-30 Kan <sup>R</sup> (pJB5457) and GST:DotL amino acids 641-783 (pJB5643) | This study              |
| JB6466         | C600 pQE-30 Kan <sup>R</sup> (pJB5457) and GST:DotL amino acids 651-783 (pJB5645) | This study              |
| JB6467         | C600 pQE-30 Kan <sup>R</sup> (pJB5457) and GST:DotL amino acids 661-783 (pJB5647) | This study              |
| JB6468         | C600 pQE-30 Kan <sup>R</sup> (pJB5457) and GST:DotL amino acids 671-783 (pJB5649) | This study              |
| JB6469         | C600 pQE-30 Kan <sup>R</sup> (pJB5457) and GST:DotL amino acids 661-780 (pJB6094) | This study              |
| JB6470         | C600 pQE-30 Kan <sup>R</sup> (pJB5457) and GST:DotL amino acids 671-780 (pJB6093) | This study              |
| JB6471         | C600 pQE-30 Kan <sup>R</sup> (pJB5457) and GST:DotL amino acids 661-773 (pJB6252) | This study              |
| JB6472         | C600 pQE-30 Kan <sup>R</sup> (pJB5457) and GST:DotL amino acids 671-773 (pJB6254) | This study              |
| JB6473         | C600 pQE-30 Kan <sup>R</sup> (pJB5457) and GST:DotL amino acids 661-763 (pJB6202) | This study              |
| <i>Plasmid</i> |                                                                                   |                         |
| pKB5           | RSF1010 cloning vector, thyA+, bla, mob                                           | Berger and Isberg, 1993 |
| pSR47S         | R6K suicide vector (Kan <sup>R</sup> sacB)                                        | Merriam et al, 1997     |
| pJB908         | pKB5 $\Delta oriT$                                                                | Sexton et al, 2004      |
| pJB1005        | pSR47S with dotL flanking regions and Cm <sup>R</sup> replacing dotL              | Buscher et al, 2005     |
| pJB1455        | pSR47S with icmS flanking regions                                                 | Vincent et al, 2006a    |
| pJB2581        | CyaA:X fusion vector RSF1010 Amp <sup>R</sup> Cm <sup>R</sup> $\Delta oriT$       | Bardill et al, 2005     |
| pJB2588        | CyaA:SdeA                                                                         | Bardill et al, 2005     |
| pJB2590        | CyaA:RalF                                                                         | This study              |
| pJB3151        | dotL complementing clone RSF1010 Amp <sup>R</sup> Kan <sup>R</sup> $\Delta oriT$  | This study              |
| pJB4509        | CyaA:VipA                                                                         | Vincent et al, 2012     |
| pJB4585        | GST:X fusion vector RSF1010, Amp <sup>R</sup> , td <i>Δi</i> , $\Delta oriT$      | This study              |
| pJB4858        | RSF1010 cloning vector, Amp <sup>R</sup> , td <i>Δi</i>                           | This study              |
| pJB5169        | CyaA:SidD                                                                         | This study              |
| pJB5253        | dotL complementing clone RSF1010 Amp <sup>R</sup> td <i>Δi</i> $\Delta oriT$      | This study              |
| pJB5273        | DotL amino acids 1-773                                                            | This study              |
| pJB5275        | DotL amino acids 1-763                                                            | This study              |
| pJB5277        | DotL amino acids 1-753                                                            | This study              |
| pJB5284        | DotL single amino acid point mutant: N486T                                        | This study              |
| pJB5285        | DotL single amino acid point mutant: N393D                                        | This study              |
| pJB5286        | DotL single amino acid point mutant: F460L                                        | This study              |
| pJB5287        | DotL single amino acid point mutant: Y725Stop                                     | This study              |
| pJB5288        | DotL single amino acid point mutant: D533N                                        | This study              |
| pJB5289        | DotL single amino acid point mutant: Y531C                                        | This study              |
| pJB5291        | DotL single amino acid point mutant: K386R                                        | This study              |
| pJB5292        | DotL single amino acid point mutant: F275S                                        | This study              |
| pJB5293        | DotL single amino acid point mutant: Q222R                                        | This study              |
| pJB5294        | DotL single amino acid point mutant: N312D                                        | This study              |
| pJB5295        | DotL single amino acid point mutant: E390G                                        | This study              |
| pJB5296        | DotL single amino acid point mutant: M239T                                        | This study              |
| pJB5316        | His:IcmS+IcmW ColE1 Kan <sup>R</sup>                                              | This study              |
| pJB5424        | GST:DotL amino acids 681-783                                                      | This study              |
| pJB5457        | pQE-30 ColE1 Kan <sup>R</sup>                                                     | This study              |
| pJB5499        | DotL amino acids 1-725 with Shine-Dalgarno from T7                                | This study              |
| pJB5556        | DotL amino acids 1-733 with Shine-Dalgarno from T7                                | This study              |
| pJB5557        | DotL amino acids 1-743 with Shine-Dalgarno from T7                                | This study              |
| pJB5562        | CyaA:LnaB                                                                         | This study              |
| pJB5582        | GST:DotL amino acids 701-783                                                      | This study              |
| pJB5585        | GST:DotL amino acids 711-783                                                      | This study              |
| pJB5641        | GST:DotL amino acids 631-783                                                      | This study              |
| pJB5643        | GST:DotL amino acids 641-783                                                      | This study              |
| pJB5645        | GST:DotL amino acids 651-783                                                      | This study              |

|         |                                                                               |            |
|---------|-------------------------------------------------------------------------------|------------|
| pJB5647 | GST:DotL amino acids 661-783                                                  | This study |
| pJB5649 | GST:DotL amino acids 671-783                                                  | This study |
| pJB5677 | pSR47S with DotLY725Stop flanking regions                                     | This study |
| pJB5738 | <i>dotL</i> complementing clone with Shine-Dalgarno from T7 phage             | This study |
| pJB5748 | <i>dotL</i> (1-1629 bp) acceptor vector RSF1010 Amp <sup>R</sup> <i>ΔoriT</i> | This study |
| pJB5751 | DotL amino acids 1-694/705-783                                                | This study |
| pJB5752 | DotL amino acids 1-684/695-783                                                | This study |
| pJB5753 | DotL amino acids 1-674/685-783                                                | This study |
| pJB5754 | DotL amino acids 1-704/715-783                                                | This study |
| pJB5755 | DotL amino acids 1-709/720-783                                                | This study |
| pJB5756 | DotL amino acids 1-714/725-783                                                | This study |
| pJB5797 | CyaA:LidA                                                                     | This study |
| pJB5919 | GST:DotL amino acids 631-670/754-783                                          | This study |
| pJB5921 | GST:DotL amino acids 631-734/754-783                                          | This study |
| pJB6021 | DotL amino acids 1-724/734-783                                                | This study |
| pJB6092 | GST:DotL amino acids 691-783                                                  | This study |
| pJB6093 | GST:DotL amino acids 671-780                                                  | This study |
| pJB6094 | GST:DotL amino acids 661-780                                                  | This study |
| pJB6096 | GST:DotL amino acids 671-753                                                  | This study |
| pJB6101 | DotL amino acids 1-670/754-783                                                | This study |
| pJB6108 | DotL amino acids 1-734/754-783                                                | This study |
| pJB6129 | DotL amino acids 1-749/760-783                                                | This study |
| pJB6130 | DotL amino acids 1-744/755-783                                                | This study |
| pJB6131 | DotL amino acids 1-739/750-783                                                | This study |
| pJB6132 | DotL amino acids 1-734/745-783                                                | This study |
| pJB6133 | DotL amino acids 1-729/740-783                                                | This study |
| pJB6202 | GST:DotL amino acids 661-763                                                  | This study |
| pJB6215 | GST:DotL amino acids 671-763                                                  | This study |
| pJB6252 | GST:DotL amino acids 661-773                                                  | This study |
| pJB6254 | GST:DotL amino acids 671-773                                                  | This study |
| pJB6256 | GST:DotL amino acids 661-753                                                  | This study |
| pJB6319 | DotL amino acids 1-674/695-783                                                | This study |
| pJB6320 | DotL amino acids 1-694/715-783                                                | This study |
| pJB6321 | DotL amino acids 1-714/734-783                                                | This study |
| pJB6322 | pSR47S with DotL amino acids 1-734/754-783 flanking regions                   | This study |

*Primer*

|         |                                                            |
|---------|------------------------------------------------------------|
| JVP1036 | CAGGTGGGACCACCGCGC                                         |
| JVP1038 | CCC <u>G</u> AATTCGGAATTAGAGCCATGATGCG                     |
| JVP1039 | CCC <u>G</u> CATGCCACTTCTACCTCCAATTGCCG                    |
| JVP1070 | CCC <u>G</u> T <u>C</u> GACTAATCATAATTAACATCATCC           |
| JVP1668 | GCAG <u>G</u> GATCCAAACACTATGATTCCATGGATCAGG               |
| JVP1669 | GCAGTCGACGAACAGAAAGTTAGCTTAACTAGAG                         |
| JVP1702 | CGCGAATTCGCATCTGTGCGGTATTTACACC                            |
| JVP1703 | CGCGGATCCACGCGGAACCAGATCCGATTTTGG                          |
| JVP1856 | GCGAGCATGCTTCTAAAGTAAGTGAATTGGCGGG                         |
| JVP1857 | GCGGCGGCCGCGCAGCAGCCTTAATGACAATAGTC                        |
| JVP1986 | CCAGGATCCCCTTCGATTATTACACAAATCTGTAATGG                     |
| JVP1987 | CCC <u>G</u> T <u>C</u> GACTTAAATAGTAAGACTCGAGTTAGTTGCAGCC |
| JVP2020 | CCATGTTGCTCCAAAACCTGGG                                     |
| JVP2022 | CAAGGATTTGCGGTAGTGCCTGCGC                                  |
| JVP2022 | CAAGGATTTGCGGTAGTGCCTGCGC                                  |
| JVP2065 | CCC <u>G</u> CATGCTTATTTCTCACGTTCTGCGGAAATTTAGC            |
| JVP2065 | CCC <u>G</u> CATGCTTATTTCTCACGTTCTGCGGAAATTTAGC            |
| JVP2066 | CCC <u>G</u> CATGCTTATAAATCTCTTATGATACCAGTAAGTTCTTG        |
| JVP2067 | CCC <u>G</u> CATGCTTAGACATCAATCACATCCCTTTCTTCAGG           |
| JVP2112 | CCC <u>G</u> GATCCCTACGAATTGACCCTAATGCTCCTCC               |
| JVP2112 | CCC <u>G</u> GATCCCTACGAATTGACCCTAATGCTCCTCC               |

JVP2113 CCCGTCGACCCGACTGAGTCTTTATGTTAATTCCTCTGC  
JVP2145 CCCGTCGACGCAAACCGAAGGTGAGGCGC  
JVP2146 CCCGGATCCCTATTTGTCTTTAGCCCCGCCAAACGC  
JVP2147 CCCGGATCCAGACTCAGTCGGCAATTGGAGG  
JVP2157 CCCGCGGCCGCCAATACATAGATGTAGTTAGTACG  
JVP2160 GTGCCATGGGCCACGTTGTGTCTCAAATCTCTG  
JVP2161 GTGCCATGGGCCAGTGTACAACCAATTAACC  
JVP2178 CCCGGATCCATTAGTAAGGCATTAAGAATCTACTATCG  
JVP2178 CCCGGATCCATTAGTAAGGCATTAAGAATCTACTATCG  
JVP2179 CCCGGATCCGTAGAGCCAATTGAACGAGGCG  
JVP2180 CCCGGATCCCTAATTGCATTTTCATGGTCAAATGAACC  
JVP2181 CCCGGATCCGAGCCTGTGGAAGATATTGTAGAGG  
JVP2181 CCCGGATCCGAGCCTGTGGAAGATATTGTAGAGG  
JVP2182 CCCGGATCCGTTGAGGGGGCATTAACTATTTTCAGC  
JVP2182 CCCGGATCCGTTGAGGGGGCATTAACTATTTTCAGC  
JVP2244 CCCGGTACCTAAGAAGGAGGTATACATATGATCGGGGTATTGATTCTCG  
JVP2263 CCCGGTACCGTCAGCGACTAATATTGGAGGAGC  
JVP2263 CCCGGTACCGTCAGCGACTAATATTGGAGGAGC  
JVP2264 CCCGGTACCAATGAAACACGAAATCAAATGATAACG  
JVP2265 CCCGGTACCGTCAATTCGTAGTTTGTCTGAAAATAGTTAATGCC  
JVP2266 CCCGGTACCAAAGAAGTTTTCTCTGAGCCATTATTACC  
JVP2266 CCCGGTACCAAAGAAGTTTTCTCTGAGCCATTATTACC  
JVP2267 CCCGGTACCTGCCCCCTCAACTTCTTCC  
JVP2267 CCCGGTACCTGCCCCCTCAACTTCTTCC  
JVP2268 CCCGGTACCCCTAATGCTCCTCCAATATTAGTCGC  
JVP2269 CCCGGTACCAATTGGTAATAATGGCTCAGAGAAAAC TTC  
JVP2270 CCCGGTACCATTGAGCGTTTGGCAGGGGC  
JVP2271 CCCGGTACCTCGTGTTCATTAATTGGTAATAATGGC  
JVP2272 CACGGTACCGGGGCTAAAGACAAATACGCTGG  
JVP2273 CCCGGTACCCGTTATCATTTGATTTTCGTTTCATTAATTGG  
JVP2273 CCCGGTACCCGTTATCATTTGATTTTCGTTTCATTAATTGG  
JVP2274 CCCGGTACCTACGCTGGTACAGTAGCTAATG  
JVP2279 CCCGGTACCGCTAATGAATTAATCAAAGATTTTCAAATAGCG  
JVP2287 CCCGGTACCTTTGTCTTTAGCCCCGCCAAACGC  
JVP2289 CCCGGTACCATCAAAGATTTTCAAATAGCGACTAGC  
JVP2289 CCCGGTACCATCAAAGATTTTCAAATAGCGACTAGC  
JVP2293 CCCGTCGACCTAGACATCAATCACATCCCTTTCTTCAGG  
JVP2318 CCCGGATCCCTTAGTCGCTGACAAAGAAGTTTTCTCTGAGCC  
JVP2319 CCCGTCGACCTACTCTGCAGCCTTTTATTGGCTTTCTCAGC  
JVP2320 CCCGGTACCTTCTCTCTACAATATCTCCACAGGC  
JVP2323 CCCGGTACCGATTAATTCATTAGCTACTGTACCAGCG  
JVP2325 GCAGGATCCTCATACCAAAAAATAGAACTCAGTATTC  
JVP2326 GCAGTCGACGCAAGAGATCTATTGTAACGAGC  
JVP2356 CCCGGATCCCATTAATTACCAATTAATGAAACAGC  
JVP2357 CCCGGATCCCAAATGATAACGATTGAGCGTTTGGC  
JVP2366 CCCGTCGACCTATAAATCTCTTATGATACCAGTAAGTTCTTGG  
JVP2367 CCCGGTACCTACTGTACCAGCGTATTGTCTTTAGCCCC  
JVP2368 CCCGGTACCGCGACTAGCTATCCTCCTGAAGAAAGGG  
JVP2369 CCCGGTACCGATTAATTCATTAGCTACTGTACCAGCG  
JVP2370 CCCGGTACCCCTGAAGAAAGGGATGTGATTGATGTCC  
JVP2371 CCCGGTACCTATTTGAAAATCTTTGATTAATTCATTAGCTACTGTACCAGCG  
JVP2372 CCCGGTACCGTGATTGATGTCCAAGAACTACTGG  
JVP2373 CCCGGTACCAGGATAGCTAGTCGCTATTTGAAAATCTTTGATTAATTCATTAGC  
JVP2374 CCCGGTACCGAACTTACTGGTATCATAAGAGATTTATCAGC  
JVP2375 CCCGGTACCATCCCTTTCTTCAGGAGGATAGCTAGTCGC  
JVP2376 CCCGGTACCATAAGAGATTTATCAGCTAAAATTTCCGCAGAACG  
JVP2392 CCCGTCGACCGTGCTCGTATGTTTTATGCCAATCC  
JVP2393 CCCGGATCCCGACTGAGTCTTTATGTTAATTCCTCTG

|         |                                       |
|---------|---------------------------------------|
| JVP2394 | CCCGGATCCGCAATTGGAGGTAGAAGTGTTC       |
| JVP2395 | CCAGCGGCCCGCGAAGTGATCTCACCTGTTATCC    |
| JVP2413 | CCCGTCGACCTATTCTCACGTTCTGCGGAAATTTAGC |
| JVP2888 | CCCGGTACCCAAGAACTTACTGGTATCATAAGAG    |
| JVP429  | CCCGTCGACCACGTTTCATCATGGCTTGG         |
| JVP432  | CCCGCGGCCGCGAGAAGCAAAACCTGATATGC      |
| JVP554  | CCCGGATCCGAGCGAGATATTAGCAAGTGTATGG    |
| JVP779  | CCCGGATCCGAAAAGATAACAAATCACATCAAG     |
| JVP780  | CCCGTCGACTATCTTATGATGTCTTGAATGG       |

Relevant restriction sites are underlined
