# Supplementary material for: The Legionella IcmSW Complex Directly Interacts with DotL to Mediate Translocation of Adaptor-Dependent Substrates
Source: PubMed Central journal article supplement (PMC3441705; doi:10.1371/journal.ppat.1002910), 2012-09-13
Supplement: ppat.1002910.s012.pdf [file ppat.1002910.s012.pdf]

Table S4. Construction of plasmids employed in this study

| Plasmid | Relevant Properties                                                                      | Vector      | Primers or Subclone               | Restriction Enzymes |
|---------|------------------------------------------------------------------------------------------|-------------|-----------------------------------|---------------------|
| pJB3151 | <i>dotL</i> complementing clone RSF1010 Amp <sup>R</sup> Kan <sup>R</sup> $\Delta oriT$  | pJB3147     | JVP1038/JVP1039                   | EcoRI/SphI          |
| pJB4585 | GST:X fusion vector RSF1010, Amp <sup>R</sup> , $\Delta \Delta i$ , $\Delta oriT$        | * See below |                                   |                     |
| pJB4858 | RSF1010 cloning vector, Amp <sup>R</sup> , $\Delta \Delta i$                             | * See below |                                   |                     |
| pJB5169 | CyaA:SidD                                                                                | pJB2581     | JVP1986/JVP1987                   | BamHI/Sall          |
| pJB5253 | <i>dotL</i> complementing clone RSF1010 Amp <sup>R</sup> $\Delta \Delta i$ $\Delta oriT$ | pJB4858     | pJB3151                           | EcoRI/SphI          |
| pJB5273 | DotL amino acids 1-773                                                                   | pJB5253     | JVP2022/JVP2065                   | SacI/SphI           |
| pJB5275 | DotL amino acids 1-763                                                                   | pJB5253     | JVP2022/JVP2066                   | SacI/SphI           |
| pJB5277 | DotL amino acids 1-753                                                                   | pJB5253     | JVP2022/JVP2067                   | SacI/SphI           |
| pJB5284 | DotL single amino acid point mutant: N486T                                               | pJB4858     | JVP1038/JVP1039                   | EcoRI/SphI          |
| pJB5285 | DotL single amino acid point mutant: N393D                                               | pJB4858     | JVP1038/JVP1039                   | EcoRI/SphI          |
| pJB5286 | DotL single amino acid point mutant: F460L                                               | pJB4858     | JVP1038/JVP1039                   | EcoRI/SphI          |
| pJB5287 | DotL single amino acid point mutant: Y725Stop                                            | pJB4858     | JVP1038/JVP1039                   | EcoRI/SphI          |
| pJB5288 | DotL single amino acid point mutant: D533N                                               | pJB4858     | JVP1038/JVP1039                   | EcoRI/SphI          |
| pJB5289 | DotL single amino acid point mutant: Y531C                                               | pJB4858     | JVP1038/JVP1039                   | EcoRI/SphI          |
| pJB5291 | DotL single amino acid point mutant: K386R                                               | pJB4858     | JVP1038/JVP1039                   | EcoRI/SphI          |
| pJB5292 | DotL single amino acid point mutant: F275S                                               | pJB4858     | JVP1038/JVP1039                   | EcoRI/SphI          |
| pJB5293 | DotL single amino acid point mutant: Q222R                                               | pJB4858     | JVP1038/JVP1039                   | EcoRI/SphI          |
| pJB5294 | DotL single amino acid point mutant: N312D                                               | pJB4858     | JVP1038/JVP1039                   | EcoRI/SphI          |
| pJB5295 | DotL single amino acid point mutant: E390G                                               | pJB4858     | JVP1038/JVP1039                   | EcoRI/SphI          |
| pJB5296 | DotL single amino acid point mutant: M239T                                               | pJB4858     | JVP1038/JVP1039                   | EcoRI/SphI          |
| pJB5316 | His:IcmS+IcmW ColE1 Kan <sup>R</sup>                                                     | * See below |                                   |                     |
| pJB5424 | GST:DotL amino acids 681-783                                                             | pJB4585     | JVP2112/JVP2113                   | BamHI/Sall          |
| pJB5457 | pQE-30 ColE1 Kan <sup>R</sup>                                                            | pQE-30      | JVP2160/JVP2161                   | BspHI               |
| pJB5499 | DotL amino acids 1-725 with Shine-Dalgarno from T7 phage                                 | pJB5738     | pJB5287                           | HindIII/SphI        |
| pJB5556 | DotL amino acids 1-733 with Shine-Dalgarno from T7 phage                                 | pJB5738     | pJB5281                           | HindIII/SphI        |
| pJB5557 | DotL amino acids 1-743 with Shine-Dalgarno from T7 phage                                 | pJB5738     | pJB5279                           | HindIII/SphI        |
| pJB5562 | CyaA:LnaB                                                                                | pJB2581     | JVP2325/JVP2326                   |                     |
| pJB5582 | GST:DotL amino acids 701-783                                                             | pJB4585     | JVP2356/JVP2113                   | BamHI/Sall          |
| pJB5585 | GST:DotL amino acids 711-783                                                             | pJB4585     | JVP2357/JVP2113                   | BamHI/Sall          |
| pJB5641 | GST:DotL amino acids 631-783                                                             | pJB4585     | JVP2178/JVP2113                   | BamHI/Sall          |
| pJB5643 | GST:DotL amino acids 641-783                                                             | pJB4585     | JVP2179/JVP2113                   | BamHI/Sall          |
| pJB5645 | GST:DotL amino acids 651-783                                                             | pJB4585     | JVP2180/JVP2113                   | BamHI/Sall          |
| pJB5647 | GST:DotL amino acids 661-783                                                             | pJB4585     | JVP2181/JVP2113                   | BamHI/Sall          |
| pJB5649 | GST:DotL amino acids 671-783                                                             | pJB4585     | JVP2182/JVP2113                   | BamHI/Sall          |
| pJB5677 | pSR47S with <i>dotLY725Stop</i> flanking regions                                         | * See below |                                   |                     |
| pJB5738 | <i>dotL</i> complementing clone with Shine-Dalgarno from T7 phage                        | pJB4860     | JVP2244/JVP2020                   | KpnI/BamHI          |
| pJB5748 | <i>dotL</i> (1-1629 bp) acceptor vector RSF1010 Amp <sup>R</sup> $\Delta oriT$           | * See below |                                   |                     |
| pJB5751 | DotL amino acids 1-694/705-783                                                           | pJB5748     | JVP2022/JVP2263 & JVP2264/JVP1036 | SacI/NotI           |
| pJB5752 | DotL amino acids 1-684/695-783                                                           | pJB5748     | JVP2022/JVP2265 & JVP2266/JVP1036 | SacI/NotI           |
| pJB5753 | DotL amino acids 1-674/685-783                                                           | pJB5748     | JVP2022/JVP2267 & JVP2268/JVP1036 | SacI/NotI           |
| pJB5754 | DotL amino acids 1-704/715-783                                                           | pJB5748     | JVP2022/JVP2269 & JVP2270/JVP1036 | SacI/NotI           |
| pJB5755 | DotL amino acids 1-709/720-783                                                           | pJB5748     | JVP2022/JVP2271 & JVP2272/JVP1036 | SacI/NotI           |
| pJB5756 | DotL amino acids 1-714/725-783                                                           | pJB5748     | JVP2022/JVP2273 & JVP2274/JVP1036 | SacI/NotI           |
| pJB5797 | CyaA:LidA                                                                                | pJB2581     | JVP779/JVP780                     | BamHI/Sall          |
| pJB5919 | GST:DotL amino acids 631-670/754-783                                                     | pJB4585     | JVP2178/JVP2113                   | BamHI/Sall          |
| pJB5921 | GST:DotL amino acids 631-734/754-783                                                     | pJB4585     | JVP2178/JVP2113                   | BamHI/Sall          |
| pJB6021 | DotL amino acids 1-724/734-783                                                           | pJB5748     | JVP2022/JVP2287 & JVP2289/JVP1036 | SacI/NotI           |
| pJB6092 | GST:DotL amino acids 691-783                                                             | pJB4585     | JVP2318/JVP2113                   | BamHI/Sall          |
| pJB6093 | GST:DotL amino acids 671-780                                                             | pJB4585     | JVP2182/JVP2319                   | BamHI/Sall          |
| pJB6094 | GST:DotL amino acids 661-780                                                             | pJB4585     | JVP2181/JVP2319                   | BamHI/Sall          |
| pJB6096 | GST:DotL amino acids 671-753                                                             | pJB4585     | JVP2182/JVP2293                   | BamHI/Sall          |
| pJB6101 | DotL amino acids 1-670/754-783                                                           | pJB5748     | JVP2022/JVP2320 & JVP2888/JVP1036 | SacI/NotI           |
| pJB6108 | DotL amino acids 1-734/754-783                                                           | pJB5748     | JVP2022/JVP2323 & JVP2288/JVP1036 | SacI/NotI           |
| pJB6129 | DotL amino acids 1-749/760-783                                                           | pJB5748     | JVP2022/JVP2375 & JVP2376/JVP1036 | SacI/NotI           |
| pJB6130 | DotL amino acids 1-744/755-783                                                           | pJB5748     | JVP2022/JVP2373 & JVP2374/JVP1036 | SacI/NotI           |
| pJB6131 | DotL amino acids 1-739/750-783                                                           | pJB5748     | JVP2022/JVP2371 & JVP2372/JVP1036 | SacI/NotI           |
| pJB6132 | DotL amino acids 1-734/745-783                                                           | pJB5748     | JVP2022/JVP2369 & JVP2370/JVP1036 | SacI/NotI           |
| pJB6133 | DotL amino acids 1-729/740-783                                                           | pJB5748     | JVP2022/JVP2367 & JVP2368/JVP1036 | SacI/NotI           |
| pJB6202 | GST:DotL amino acids 661-763                                                             | pJB4585     | JVP2181/JVP2366                   | BamHI/Sall          |
| pJB6215 | GST:DotL amino acids 671-763                                                             | pJB4585     | JVP2182/JVP2366                   | BamHI/Sall          |
| pJB6252 | GST:DotL amino acids 661-773                                                             | pJB4585     | JVP2181/JVP2413                   | BamHI/Sall          |
| pJB6254 | GST:DotL amino acids 671-773                                                             | pJB4585     | JVP2182/JVP2413                   | BamHI/Sall          |
| pJB6256 | GST:DotL amino acids 661-753                                                             | pJB4585     | JVP2181/JVP2293                   | BamHI/Sall          |
| pJB6319 | DotL amino acids 1-674/695-783                                                           | pJB5748     | JVP2022/JVP2267 & JVP2266/JVP1036 | SacI/NotI           |
| pJB6320 | DotL amino acids 1-694/715-783                                                           | pJB5748     | JVP2022/JVP2263 & JVP2270/JVP1036 | SacI/NotI           |
| pJB6321 | DotL amino acids 1-714/734-783                                                           | pJB5748     | JVP2022/JVP2273 & JVP2289/JVP1036 | SacI/NotI           |
| pJB6322 | pSR47S with DotL amino acids 1-734/754-783 flanking regions                              | pSR47S      | JVP2392/JVP2393 & JVP2394/JVP2395 | Sall/NotI           |

\*Detailed description of specific plasmid constructions:

- pJB4585 GST:X fusion vector RSF1010, Amp<sup>R</sup>, tdΔi, Δ*oriT*  
pKB5 was digested with EcoRI/HpaI to remove Ptac and tdΔi. tdΔi was cloned back into the EcoRI/HpaI sites of pKB5 in the reverse orientation, resulting in the promoter-less pKB5 derivative, pJB98. Δ*oriT* was subcloned on a SfiI/BstZI71 fragment from pJB908 and cloned into the SfiI/BstZI71 sites of pJB98, resulting in pJB1343. JVP1702/JVP1703 were used to amplify LacIQ, Ptac, and GST from pGEX-2T (GE-Healthcare Life Sciences), this PCR product was digested with EcoRI/BamHI and cloned into the EcoRI/BamHI sites of pJB1343, resulting in pJB4585. This vector expresses GST at the same levels as pGEX-2T, but has an RSF1010 origin, allowing for expression in *L. pneumophila*.
- pJB4858 RSF1010 cloning vector, Amp<sup>R</sup>, tdΔi  
pJB1301 (pJB908 with HindIII site replaced by a NotI site) was digested with EcoRI to remove tdΔi, plasmid was re-ligated resulting in pJB4850, then tdΔi was amplified with JVP1856/JVP1857 and cloned into the SphI/NotI sites, resulting in pJB4858.
- pJB5316 His:IcmS+IcmW ColE1 Kan<sup>R</sup>  
IcmS was amplified from Lp02 genomic DNA using JVP554/1070. This PCR product was digested with BamHI/SalI and cloned into the BamHI/SalI sites of pQE-30 (Qiagen), resulting in pJB2894. IcmW was subcloned from pJB2872 (His:IcmS+IcmW in pQE-30) using SalI/PstI and cloned into the SalI/PstI sites of pJB2894, resulting in pJB3204. pJB3204 was digested with BspHI to remove Amp<sup>R</sup>. Kan<sup>R</sup> was subcloned from pKRB11 (Reece et al, 1995) using SmaI and cloned into the BspHI sites of pJB3204, resulting in pJB5316.
- pJB5677 pSR47S with *dotLY725Stop* flanking regions  
The N-terminal 500 bp of flanking *dotLY725Stop* DNA was amplified with JVP2145/JVP2146. This fragment was digested with SalI/BamHI and cloned into the SalI/BamHI sites of pSR47S, resulting in pJB5451. Next the C-terminal 500 bp of flanking *dotLY725Stop* DNA was amplified with JVP2157/JVP2147. This fragment was digested with BamHI/NotI and cloned into the BamHI/NotI sites of pSR47S, resulting in pJB5468. The N-terminal 500 bp of flanking *dotLY725Stop* was subcloned from pJB5451 and cloned into the SalI/BamHI sites of pJB5468, resulting in pJB5677.
- pJB5748 *dotL* (1-1629 bp) acceptor vector RSF1010 Amp<sup>R</sup> Δ*oriT*  
pJB5253 was digested with EcoRI/SacI to obtain basepairs 1-1629 of *dotL*. This fragment was cloned into the EcoRI/SacI sites of pJB4850, resulting in an *dotL* acceptor vector that contains the first 1629 bp that was used to construct internal *dotL* deletions.
